# Supplementary material
Source: PubMed Central journal article supplement (PMC11369643)
Supplement: NIHMS2012449-supplement-Jurisdiction_characteristics.pdf [file NIHMS2012449-supplement-Jurisdiction_characteristics.pdf]

**Jurisdiction characteristics, by data source.**

| Participant ID  | Annual HIV diagnoses (2011)* | HIV prevalence (2010)* | Jurisdiction population size† | % of state pop. in urban areas‡ | Health dept. type§ | Region of U.S. | Change in CDC HIV prevention funding since 2010¶ |
|-----------------|------------------------------|------------------------|-------------------------------|---------------------------------|--------------------|----------------|--------------------------------------------------|
| Interviews      |                              |                        |                               |                                 |                    |                |                                                  |
| HD8,PO5         | <1,500                       | High                   | 1,000,000-4,999,999           | -                               | City               | Midwest        | ↑                                                |
| HD3,HD4,PO4     | < 1000                       | High                   | <1,000,000                    | -                               | City               | West           | ↑                                                |
| HD1,PO1         | < 1000                       | High                   | 5,000,000+                    | 76%                             | State              | South          | ↑                                                |
| HD5,HD6,HD7,PO3 | < 1000                       | Medium                 | 5,000,000+                    | 92%                             | State              | Northeast      | ↓                                                |
| HD2,PO2         | < 1000                       | Low                    | 1,000,000-4,999,999           | 64%                             | State              | Midwest        | ↓                                                |
| Consultation    |                              |                        |                               |                                 |                    |                |                                                  |
| HD9             | 1,500+                       | High                   | 5,000,000+                    | -                               | City               | Northeast      | ↑                                                |
| HD13            | 1,000-1,499                  | High                   | 5,000,000+                    | 87%                             | State              | Northeast      | ↓                                                |
| HD11            | 1,500+                       | High                   | 5,000,000+                    | 66%                             | State              | South          | ↑                                                |
| HD14            | 1,000-1,499                  | High                   | 1,000,000-4,999,999           | -                               | City               | Northeast      | ↑                                                |
| HD10            | 1,000-1,499                  | High                   | 1,000,000-4,999,999           | -                               | City               | South          | ↑                                                |
| HD12            | 1,000-1,499                  | Medium                 | 1,000,000-4,999,999           | 73%                             | State              | South          | ↑                                                |
| HD15            | < 1000                       | Medium                 | 5,000,000+                    | 66%                             | State              | South          | ↑                                                |
| HD16            | < 1000                       | Medium                 | 5,000,000+                    | 84%                             | State              | West           | ↑                                                |
| HD17            | < 1000                       | Medium                 | 1,000,000-4,999,999           | 88%                             | State              | Northeast      | ↓                                                |
| HD18            | < 1000                       | Low                    | 1,000,000-4,999,999           | 71%                             | State              | West           | ↓                                                |
| HD19            | < 1000                       | Low                    | <1,000,000                    | 57%                             | State              | Midwest        | ↓                                                |

Abbreviations: HD, health department; PO, project officer.

\* 2010 HIV prevalence and 2011 HIV diagnosis data reported to CDC's National HIV Surveillance System by CDC-funded health departments. <http://www.cdc.gov/hiv/pdf/library/reports/surveillance/cdc-hiv-surveillance-report-2011-vol-23.pdf>. HIV prevalence categories: high≥20,000 people living with HIV, or PLWH; medium=10,001-19,999 PLWH; low≤10,000 PLWH.

† Based on 2010 U.S. Census estimates. <http://www.census.gov/quickfacts/table/PST045215/00>.

‡ Based on 2010 U.S. Census data. <https://www.census.gov/geo/reference/ua/urban-rural-2010.html>.

§ City or state health department directly funded by CDC.

¶ Change in CDC HIV prevention funding level for health departments from 2010-2011 CDC HIV prevention program funding (PS10-1001 program announcement) to 2012-2015 CDC HIV prevention program funding (PS12-1201 program announcement).
